# Supplementary material
Source: PubMed Central journal article supplement (PMC3163949)

## SUPPLEMENTARY INFORMATION

### SUPPLEMENTARY FIGURE LEGENDS

**Supplementary Figure S1. Overall expression of each miRNA in A549 cells.** A549 cells were transfected with the indicated miRNA-expressing plasmids. Expression of the miRNA was assayed by qRT-PCR and normalized to vector transfected cells.

**Supplementary Figure S2. MiR-107 colocalizes with let-7 in the cytoplasm.** (A) Existence of Ago1 in a complex of synthesized miRNAs. Cy3-labeled miR-107 or nonspecific miR-26a was cotransfected into A549 cells with cy5-labeled let-7 mRNA and then immunoprecipitated with anti-cy3/cy5 antibodies to determine if they could recruit Ago1. (B) *In vivo* cellular localization of miR-107 and let-7 in A549 cells visualized by confocal microscopy.

**Supplementary Figure S3. FRET between mutmiR-107 and mutlet-7.** Cells with colocalization of mutmiR-107/mutlet-7a observed by confocal microscopy (Supplementary Figure S2B) were bleached repeatedly by  $\lambda = 633$  nm, and the fluorescence intensity of cy3-labeled miR-107 was subsequently monitored at  $\lambda = 575-615$  nm before and after

photobleaching. The FRET efficiency at each location was measured. a-d: colocalized complexes; e: complex without colocalization.

**Supplementary Figure S4. Inverse correlation between miR-107 and let-7 family miRNAs in public database - NCI-60 cancer cell panel (EMBL-EBI: E-MTAB-327)**

**Supplementary Figure S5. Expression of let-7 precursors after depletion of miR-107.**

Total RNA was isolated from the indicated cells transfected with an miR-107 antagomir and then assayed by qRT-PCR.

**Supplementary Figure S6. Effect of miR-107 on the degradation of let-7 precursors.**

An miR-107 antagomir was introduced into H1299 cells in the presence of 1  $\mu$ g/ml actinomycin D. Total RNA was isolated and assayed by quantitative PCR for pri-let-7 (A), pre-let-7 (B), and (C) miR-26a.

**Supplementary Figure S7. Effect of miR-107 on let-7-mediated HMGA2 inhibition.**

Cells were treated with the indicated antagomirs and assayed by Western blot 36 hours after transfection.

**Supplementary Figure S8. MiR-107 expression did not promote soft agar growth in let-7-deficient cells.** The indicated miRNAs were stably transfected into let-7- deficient H661 cells. Soft agar assays were performed over 14 days.

**Supplementary Figure S9. MiR-107 antagonized let-7-suppressed self-renewal ability in breast cancer cells.** (A, B) Expression of breast cancer stem cell markers. assayed by (A) RT-PCR and (B) immunofluorescence staining. (C, D) Effect of miR-107 on mammosphere formation. Mammosphere formation was performed 16 hours after transfection, and spheres were measured after 5 days.

**Supplementary Figure S10. Expression of let-7a in Normal/Tumor portions of breast cancer tissues.** We isolated RNAs from paired tumor and non-tumor samples. Expression of let-7a was detected by qRT-PCR. The level of let-7a in non-tumor tissue was used as a reference (= 1) and the relative fold expression in the tumor tissue was determined.

**Supplementary Figure S11. Correlation between miR-107 and let-7 levels in human lung cancer.** Correlation between miR-107 and let-7 levels in human lung tumor tissues. Real-time PCR was used to detect expression of miR-107 and let-7. Each point on the graph corresponds to the relative expression level from an individual patient.

**Supplementary Figure S12. Let-7a level predicts poor clinical outcome in patients with breast cancer.** The log-rank test (2-sided) was used to compare differences between groups. (A) Disease-free survival of patients with different let-7a levels. (B) Overall survival of patients with different let-7a levels..

**Supplementary Figure S13. Let-7 activity affected by miR-103.** A549 cells were cotransfected with wild-type or mutant lin-41 and the indicated miRNAs. Firefly luciferase reporter activity was normalized to renilla luciferase. MiR-26a was included as a nonspecific miRNA.

**Supplementary Figure S14. Correlation between levels of miR-103 and let-7a in human breast cancer tissues.** qRT-PCR was used to detect expression of miR-103 and let-7a. Each point on the graph corresponds to the relative expression levels from an individual patient. We normalized let-7a and miR-103 levels with U6 to calculate their relative expression levels.

**Supplementary Figure S15. Effects of let-7 members on miR-107 expression.** T47D cells were transfected with indicated antagomirs of let-7 members. Forty-eight hours after

transfection, the level of miR-107 was measured by using qRT-PCR.

**Supplementary Figure S16. Expression of let-7 family members in the livers (A) and kidneys (B) of miR-107 knockout (KO) mice.** Livers and kidneys were isolated from wild-type and miR-107 KO mice (n = 3). Expression of miRNAs was determined by real-time RT-PCR using specific probes.

**Supplementary Table S1. Incidence of tumor formation and metastasis by 4T1 cells in mice.**

| Inoculated                  | Tumors | Lung Metastasis |
|-----------------------------|--------|-----------------|
| Vector                      | 8/9    | 6/9             |
| miR-107                     | 8/9    | 7/9             |
| mutmiR-107                  | 7/9    | 5/9             |
| let-7                       | 3/9    | 0/9             |
| let-7/miR-107               | 8/9    | 4/9             |
| let-7/miR-107 <sup>M2</sup> | 4/9    | 0/9             |
| let-7/mutmiR-107            | 3/9    | 0/9             |

**Supplementary Table S2. Clinicalpathological characteristics of breast cancer patients with associated let-7a expression.**

| characteristics                    | let-7a low (n=55) | let-7a high (n=57) | <i>P</i> value |
|------------------------------------|-------------------|--------------------|----------------|
| Age                                | 62.3              | 62.9               | <i>N.S.</i>    |
| Stage, no of patients              |                   |                    |                |
| I-II                               | 20                | 42                 | *<0.001        |
| III-IV                             | 35                | 15                 |                |
| Tumor status, no of patients       |                   |                    |                |
| T1                                 | 19                | 31                 | *0.035         |
| T2-T4                              | 36                | 26                 |                |
| Node status, no of patients        |                   |                    |                |
| N0                                 | 23                | 44                 | *<0.001        |
| N1-N3                              | 32                | 13                 |                |
| Distant metastasis, no of patients |                   |                    |                |
| M0                                 | 40                | 53                 | *0.0043        |
| M1                                 | 15                | 4                  |                |

\**P* < 0.05 Significance of association was determined using a Chi-square test.

## SUPPLEMENTARY FIGURES

Supplementary Figure S1.

| Group<br>Specific miRNA<br>expression (fold) | mi R-346 | miR-329 | miR-107 | miR-330 | miR-374 | miR-202* | miR-26a |
|----------------------------------------------|----------|---------|---------|---------|---------|----------|---------|
| miR-346                                      | 16.2     | 1.0     | 1.2     | 1.1     | 0.9     | 1.0      | 1.2     |
| miR-329                                      | 0.9      | 18.5    | 1.1     | 0.9     | 1.0     | 1.0      | 1.2     |
| miR-107                                      | 0.9      | 1.0     | 19.4    | 0.9     | 1.0     | 1.0      | 1.0     |
| miR-330                                      | 1.0      | 1.0     | 1.0     | 16.8    | 1.0     | 0.9      | 1.1     |
| miR-374                                      | 1.1      | 1.0     | 1.0     | 1.1     | 16.9    | 0.9      | 1.0     |
| miR-202*                                     | 1.0      | 1.0     | 1.2     | 0.9     | 1.1     | 18.2     | 1.0     |
| miR-26a                                      | 0.9      | 1.1     | 0.9     | 0.9     | 0.9     | 1.1      | 17.6    |
| miR-376a                                     | 1.0      | 0.9     | 1.0     | 1.0     | 0.9     | 1.0      | 0.9     |
| let-7                                        | 1.0      | 1.1     | 0.4     | 1.0     | 0.9     | 1.1      | 1.0     |

Fold: Normalized with vector control

## Supplementary Figure S2A.

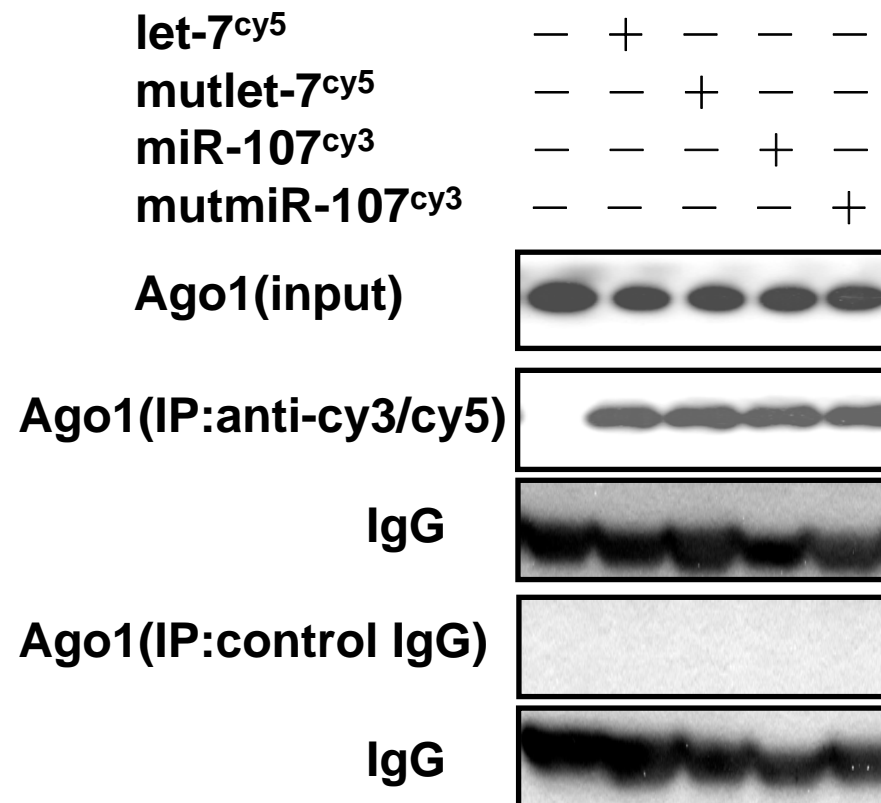

Supplementary Figure S2B.

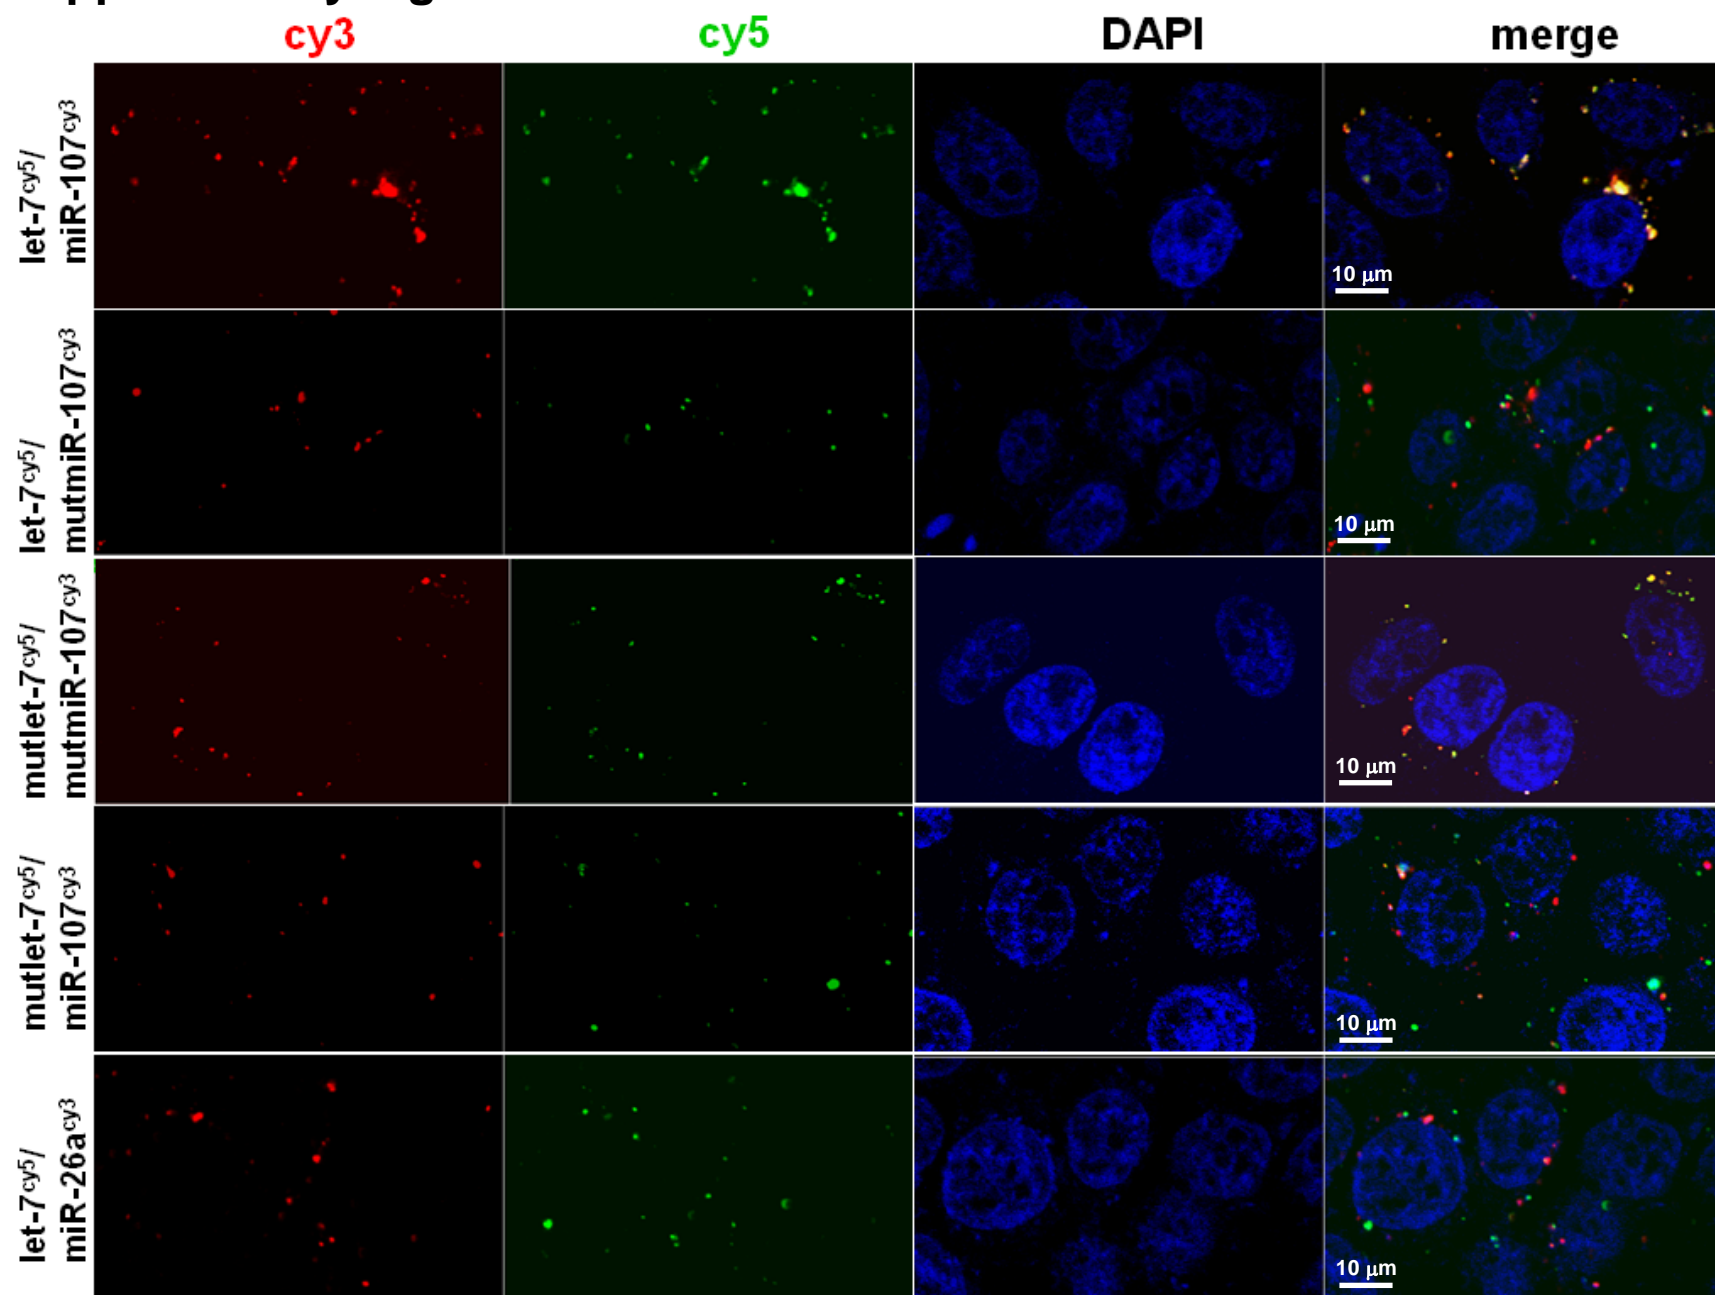

# Supplementary Figure S3.

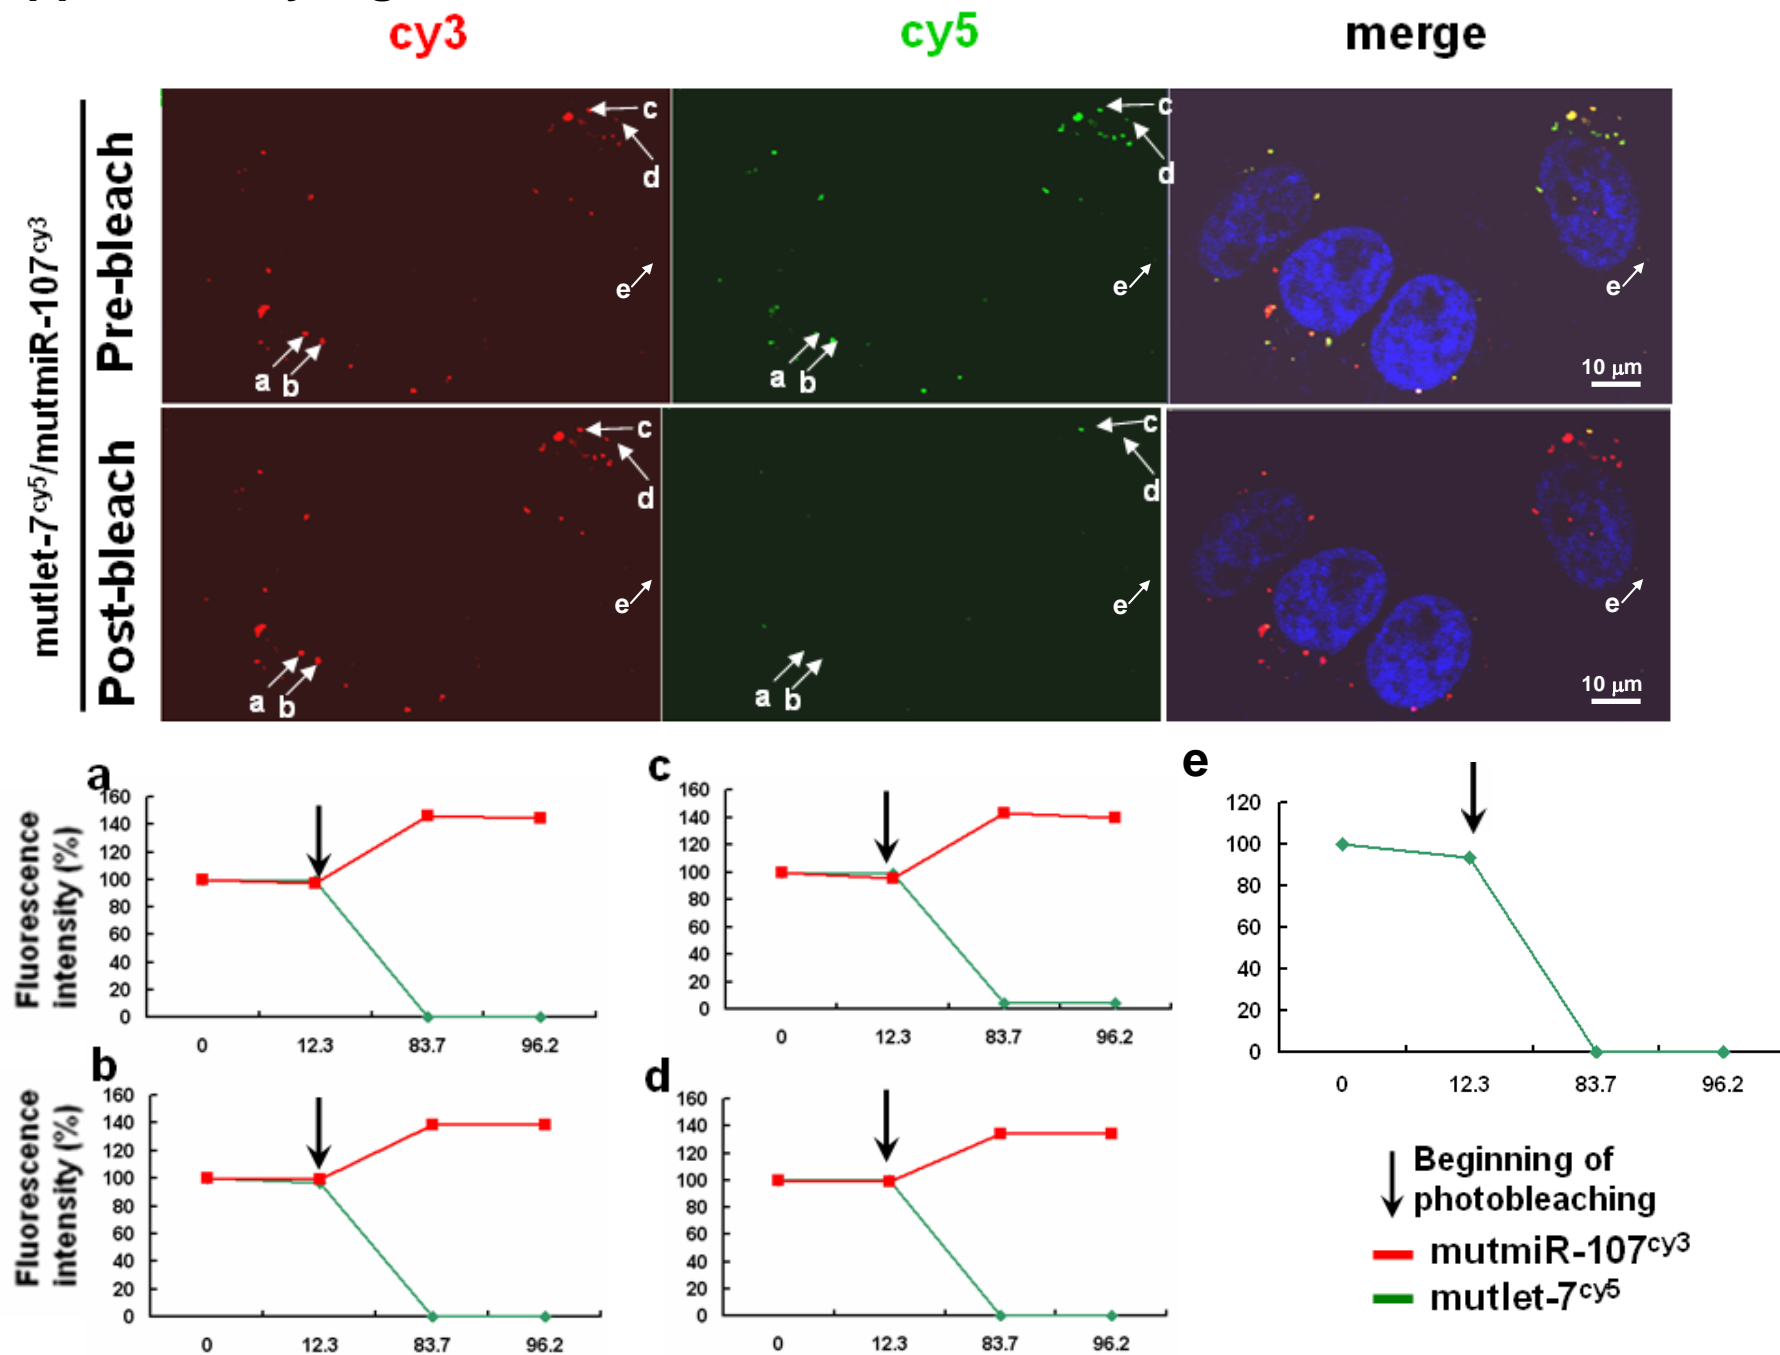

# Supplementary Figure S4.

## NCI-60

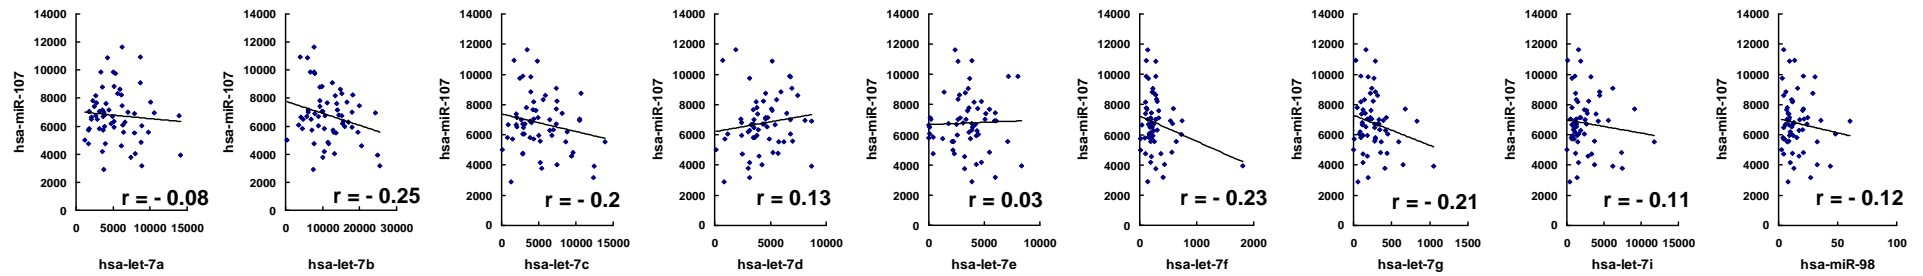

## NCI-60-CNS

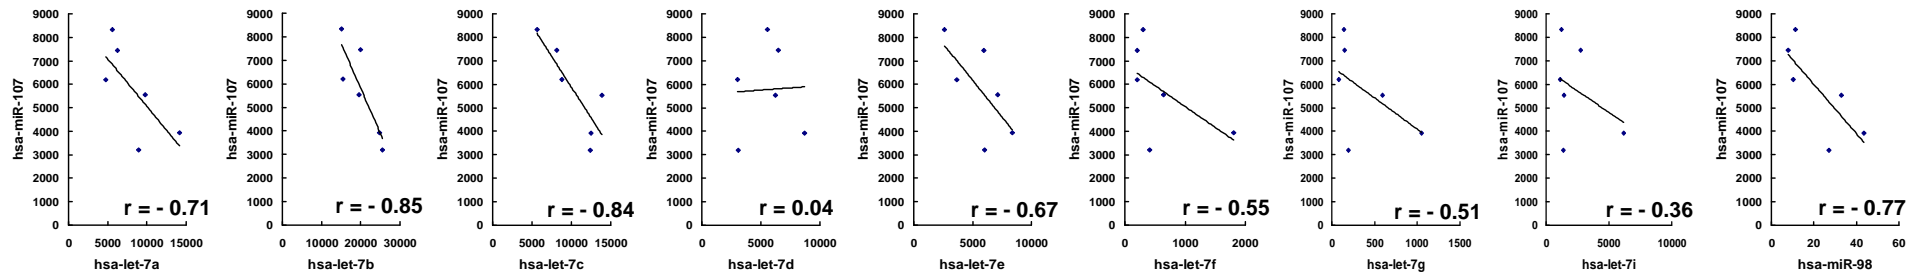

## NCI-60-Breast

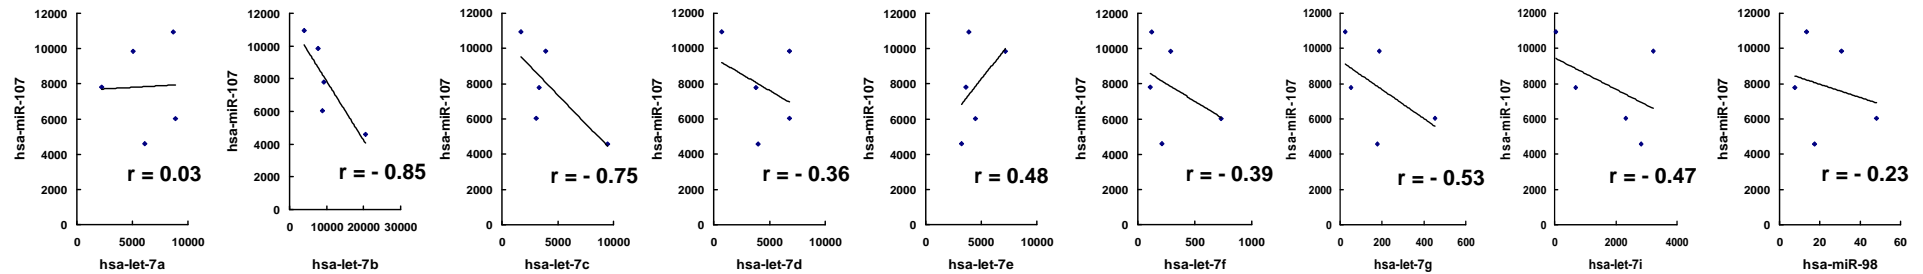

## NCI-60-Kidney

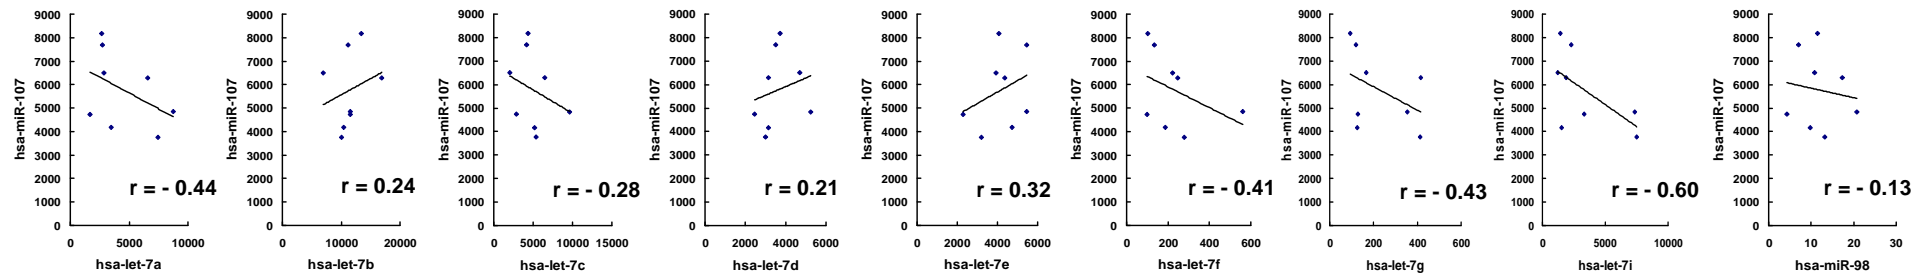

Supplementary Figure S5.

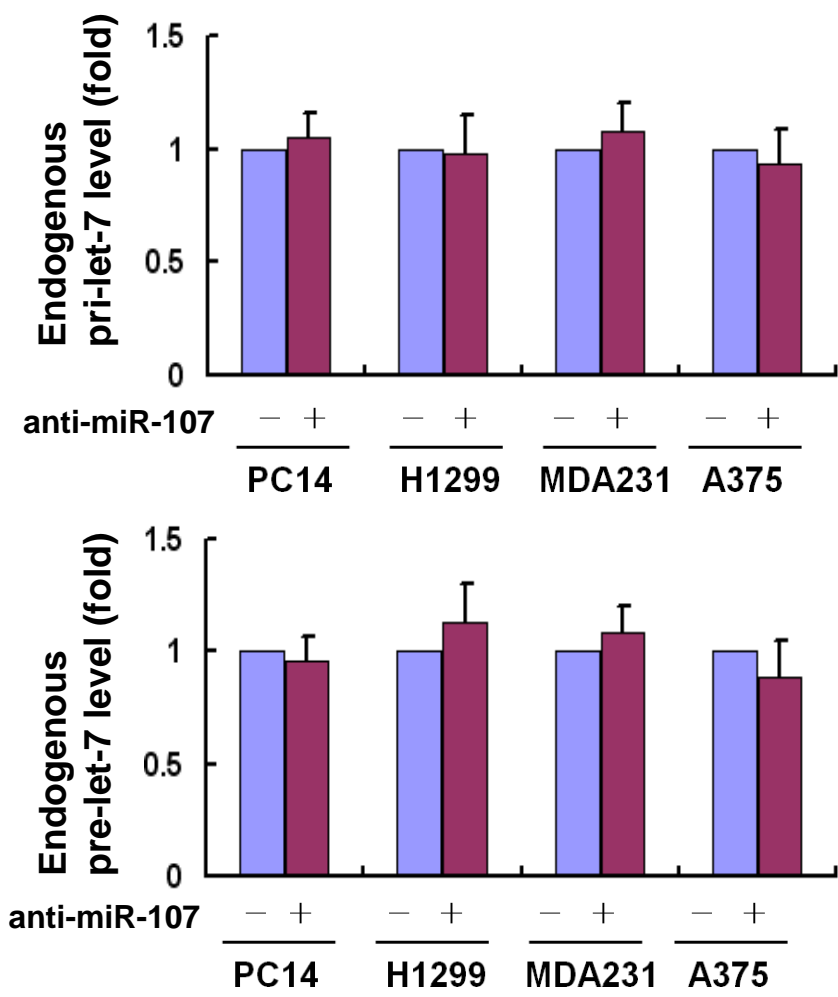

Supplementary Figure S6.

A

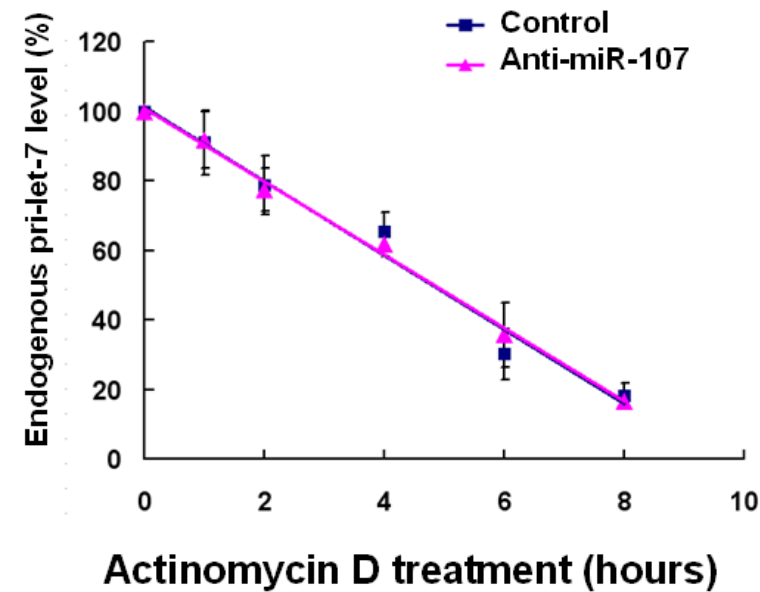

B

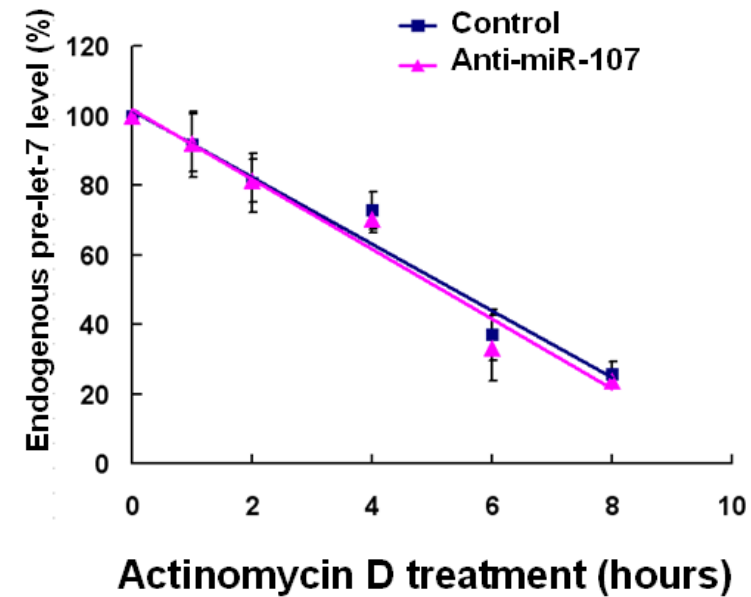

C

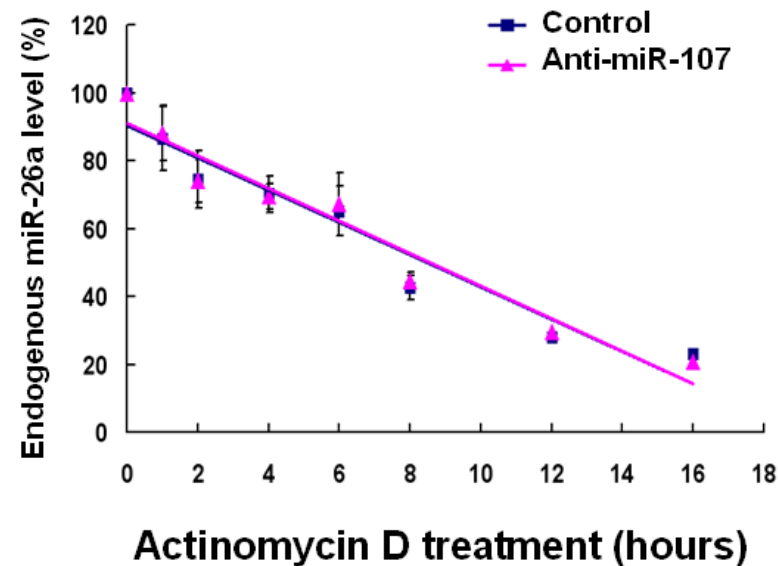

Supplementary Figure S7.

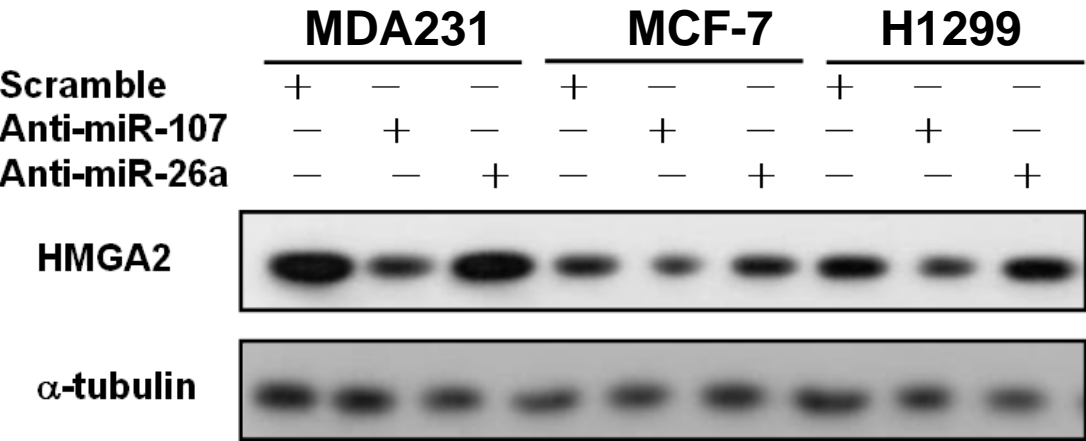

Supplementary Figure S8.

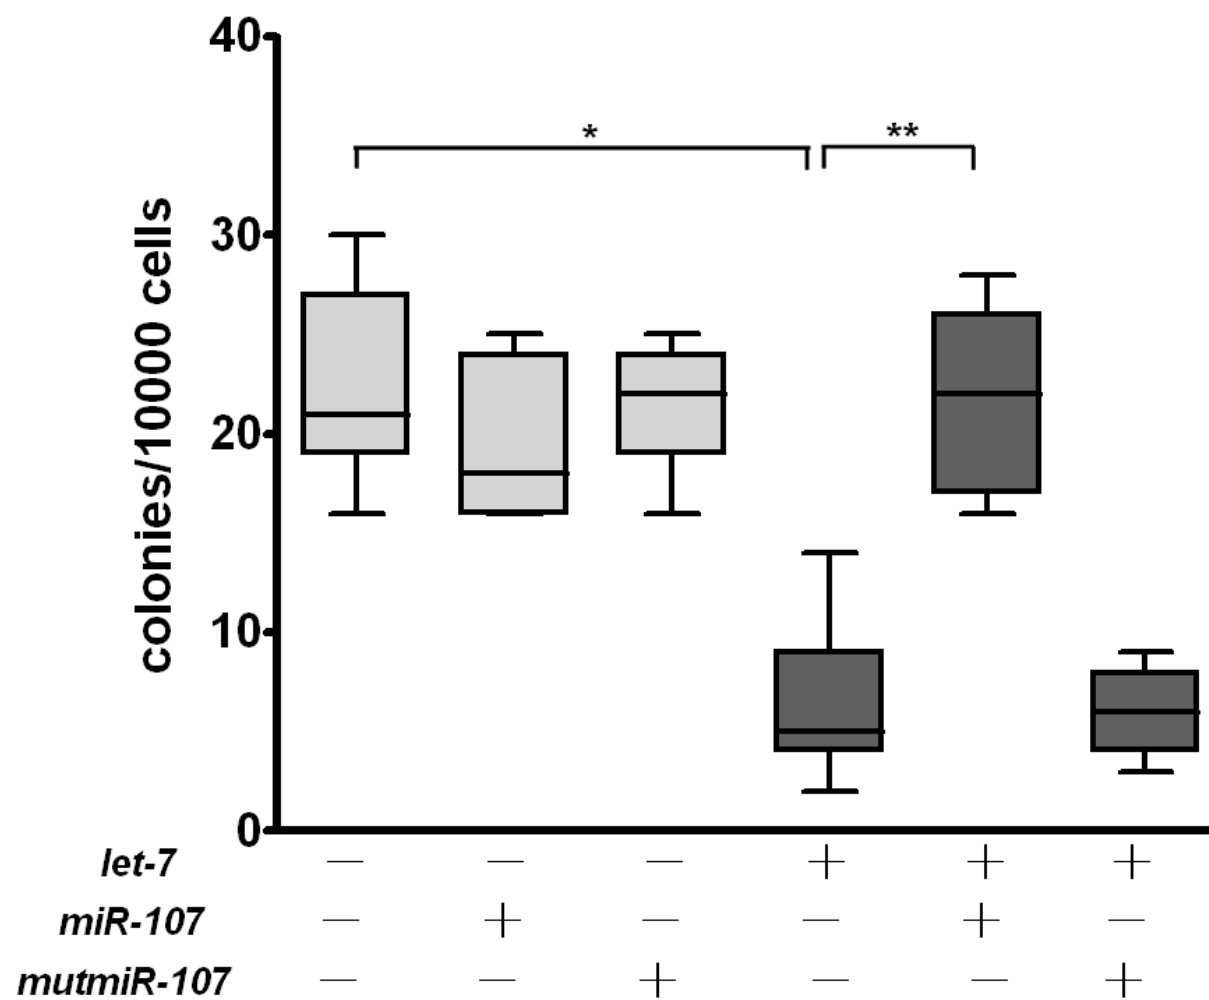

# Supplementary Figure S9.

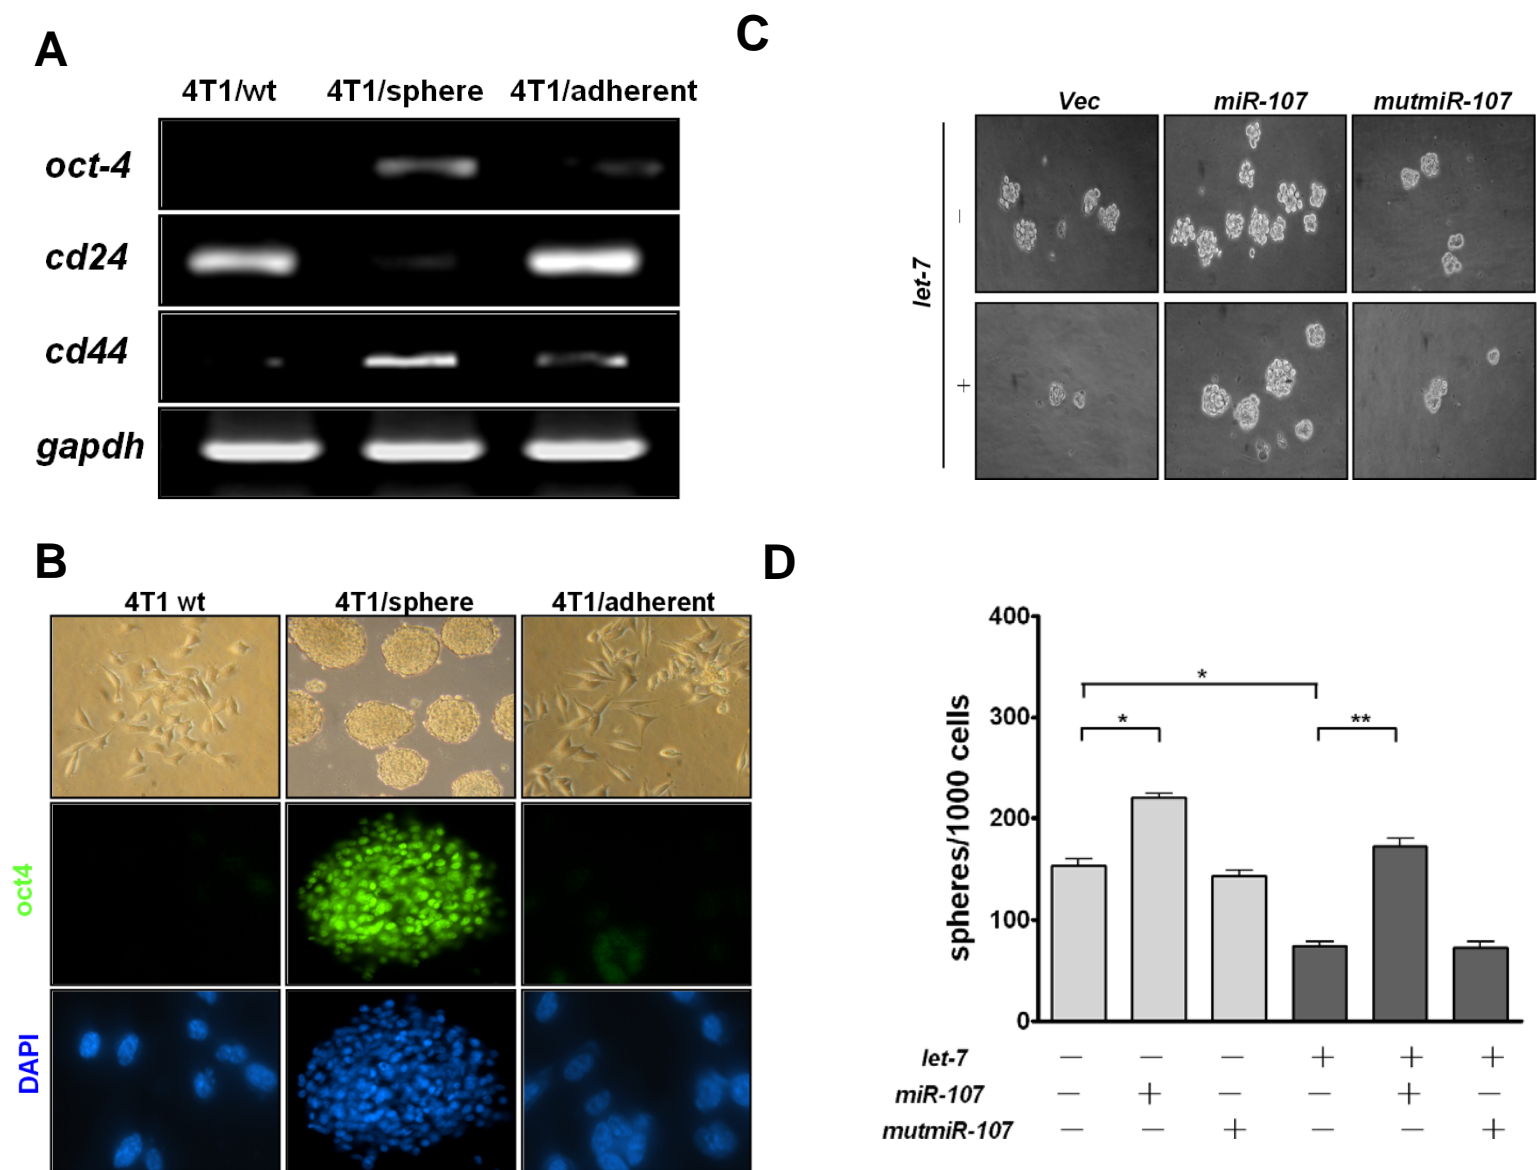

**Supplementary Figure S10.**

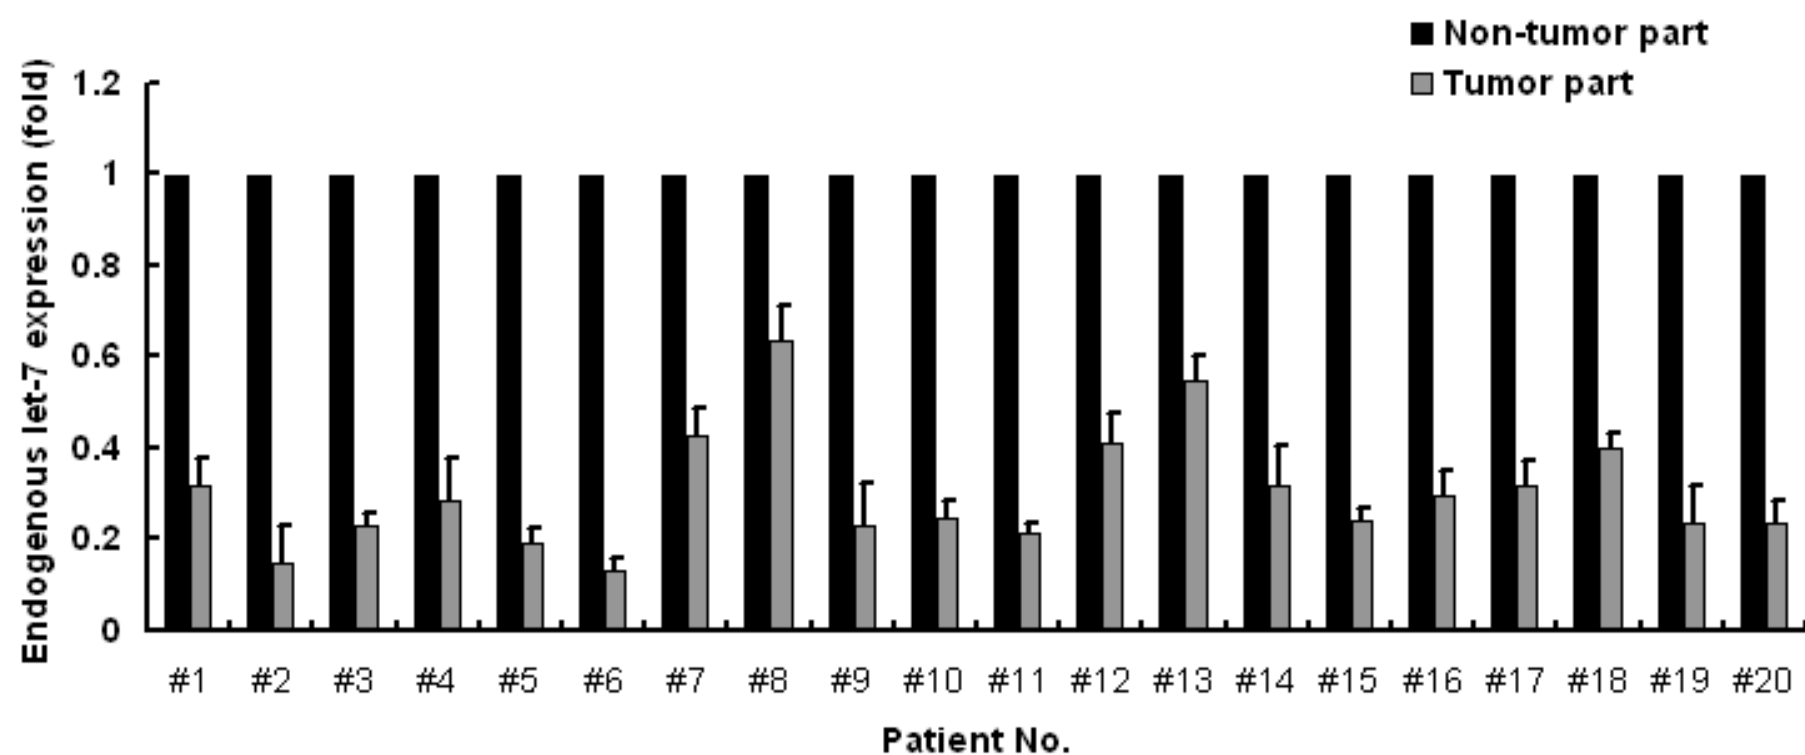

**Supplementary Figure S11.**

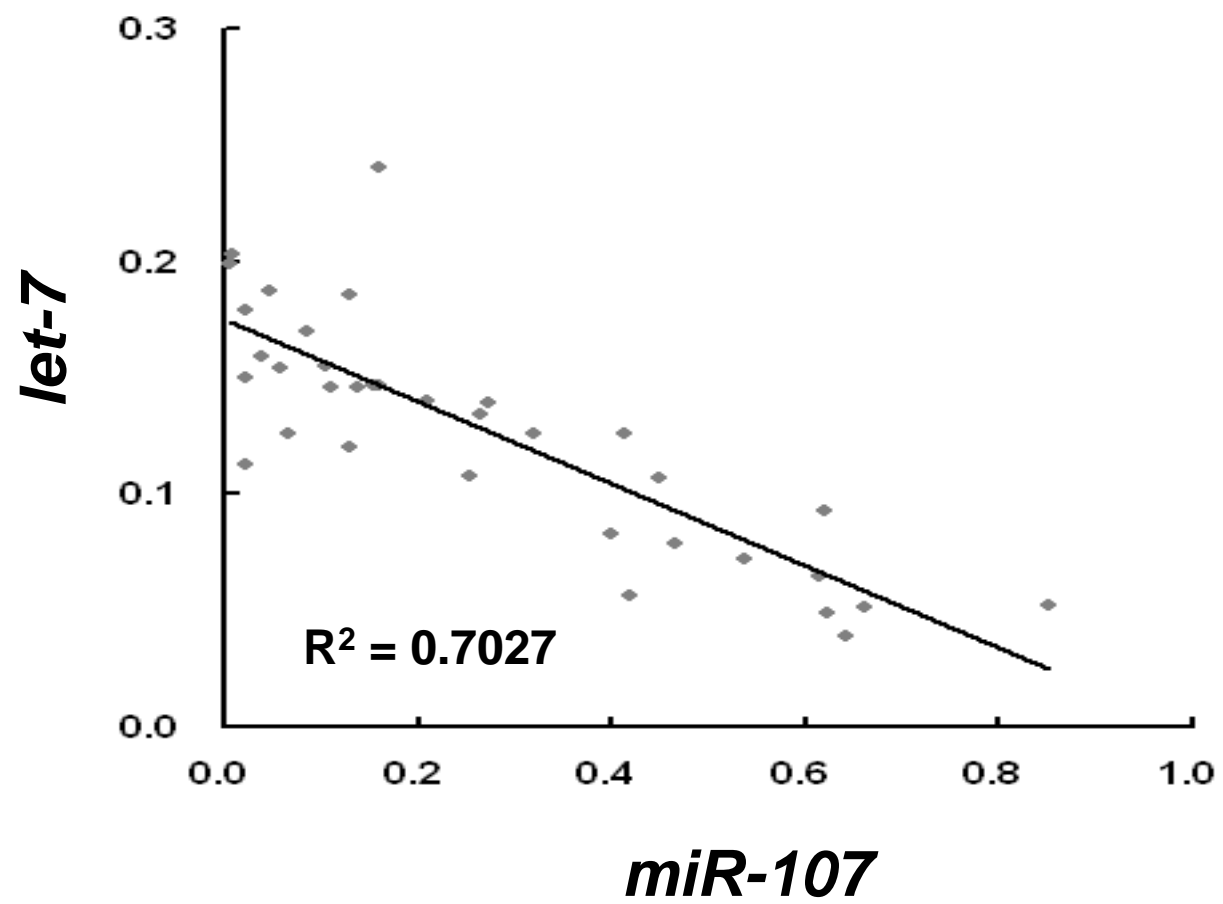

## Supplementary Figure S12.

**A**

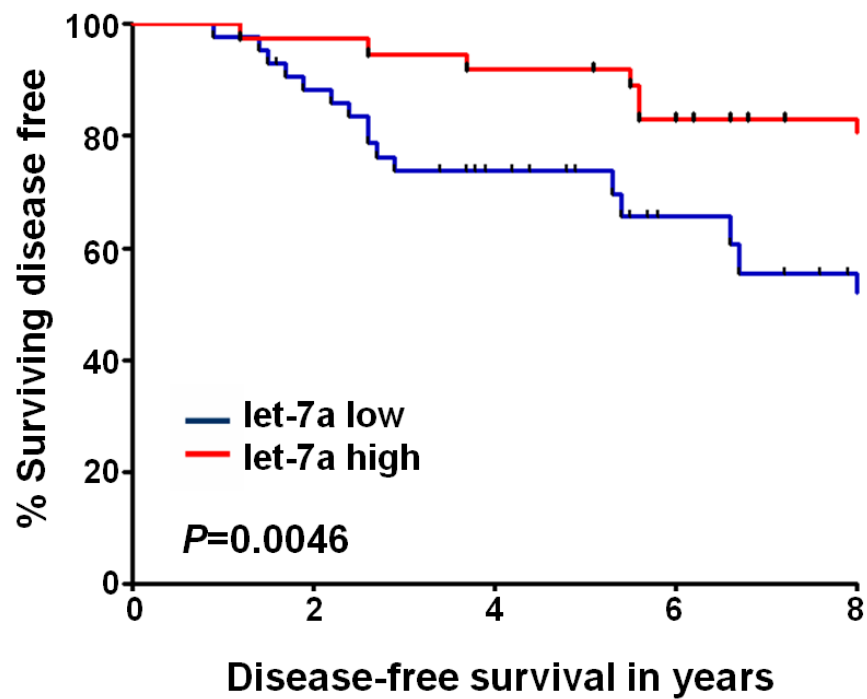

**B**

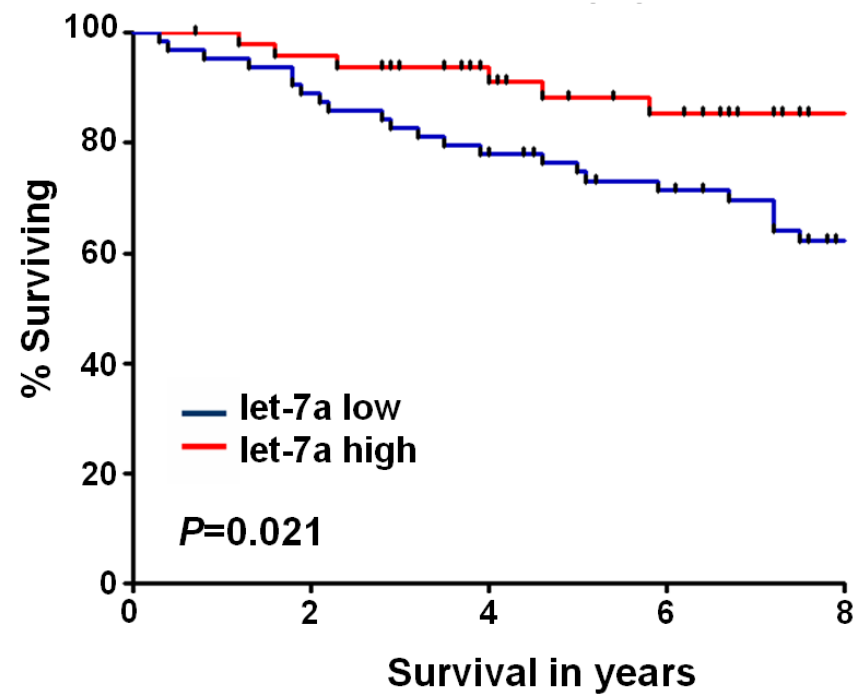

**Supplementary Figure S13.**

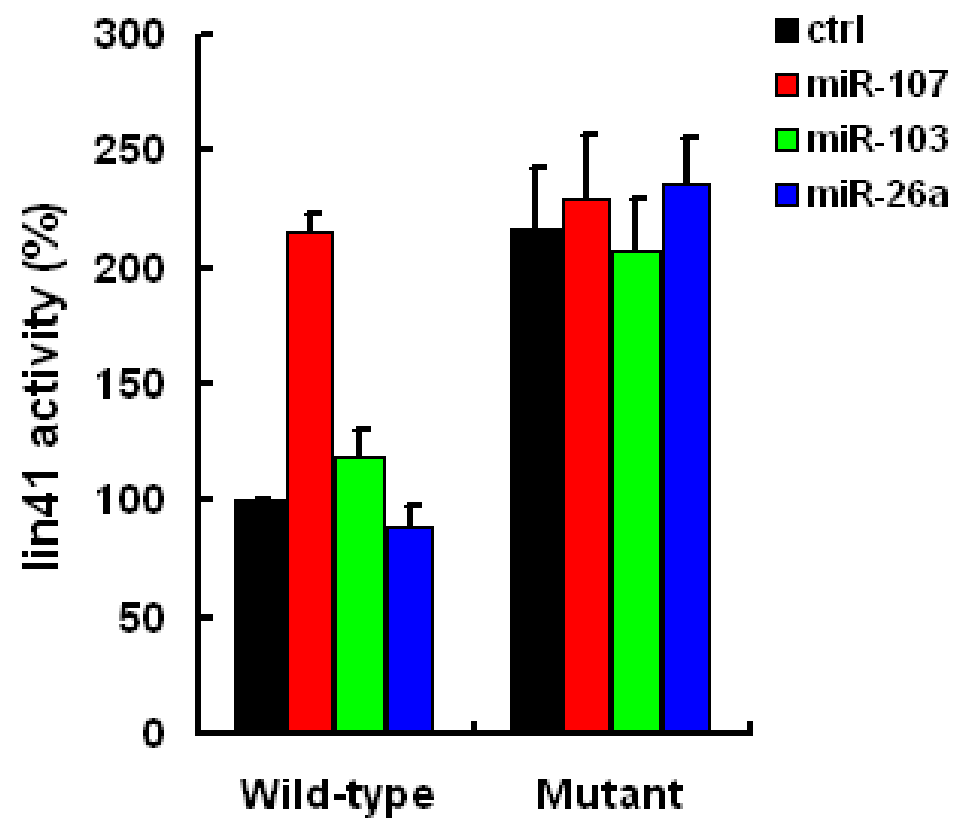

Supplementary Figure S14.

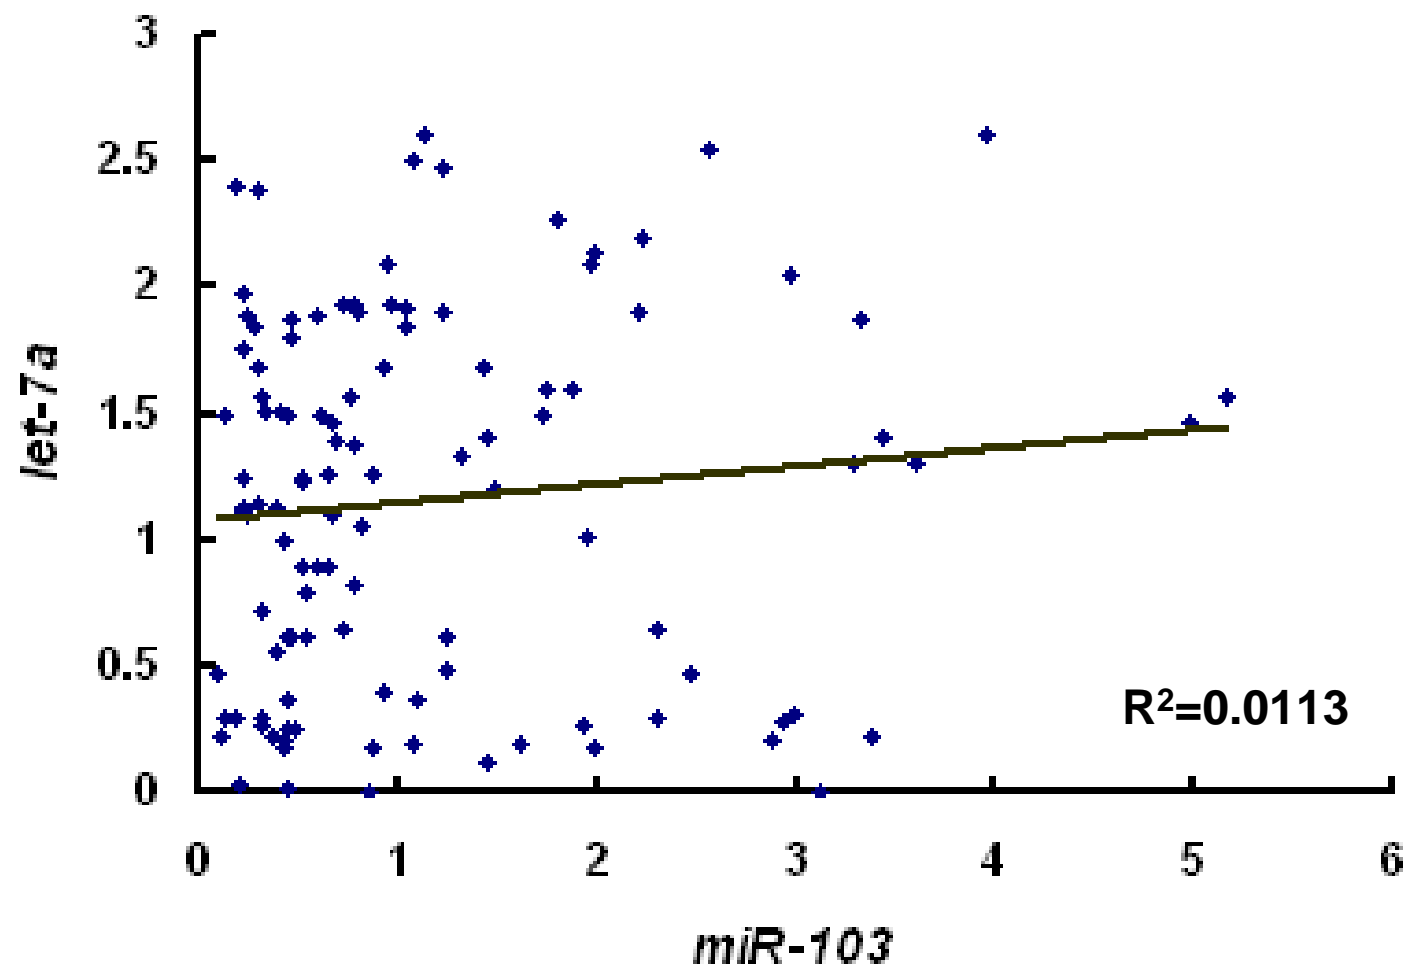

**Supplementary Figure S15.**

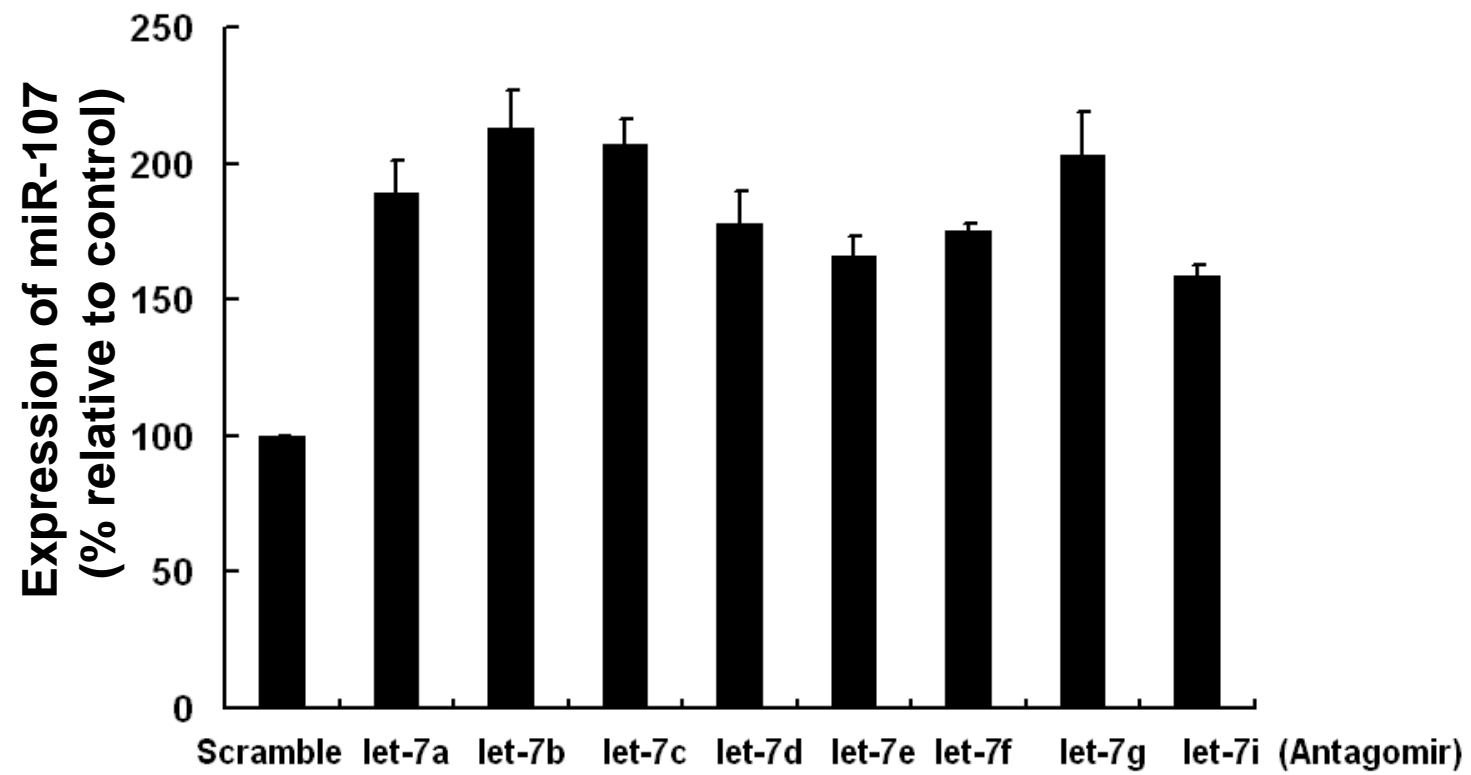

Supplementary Figure S16. A

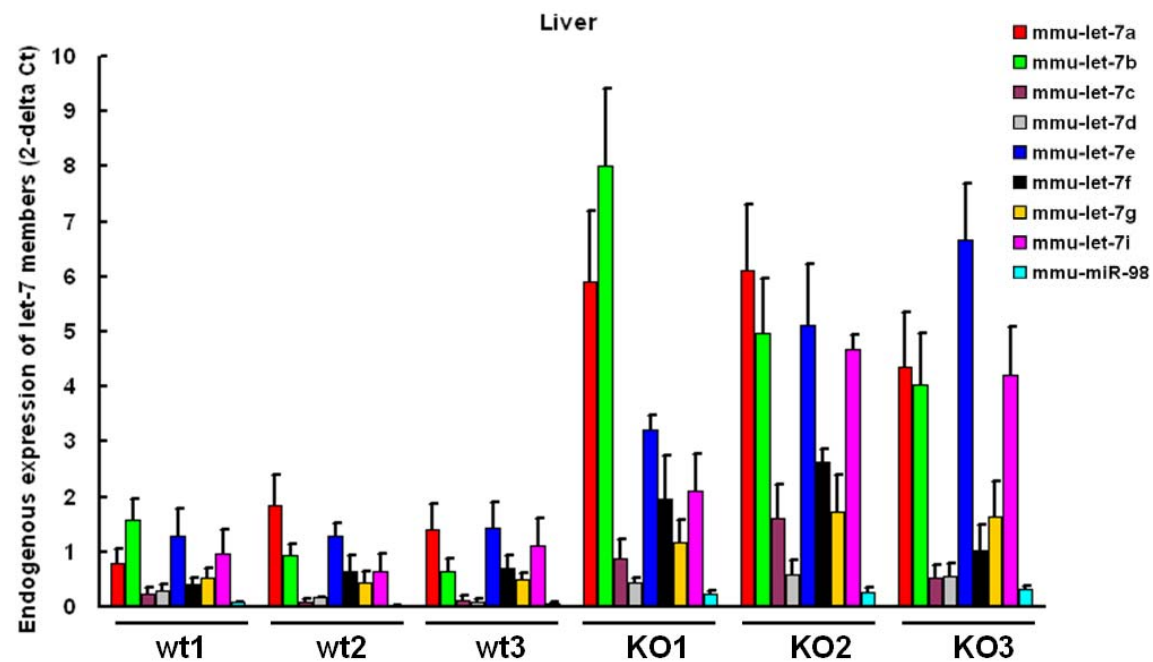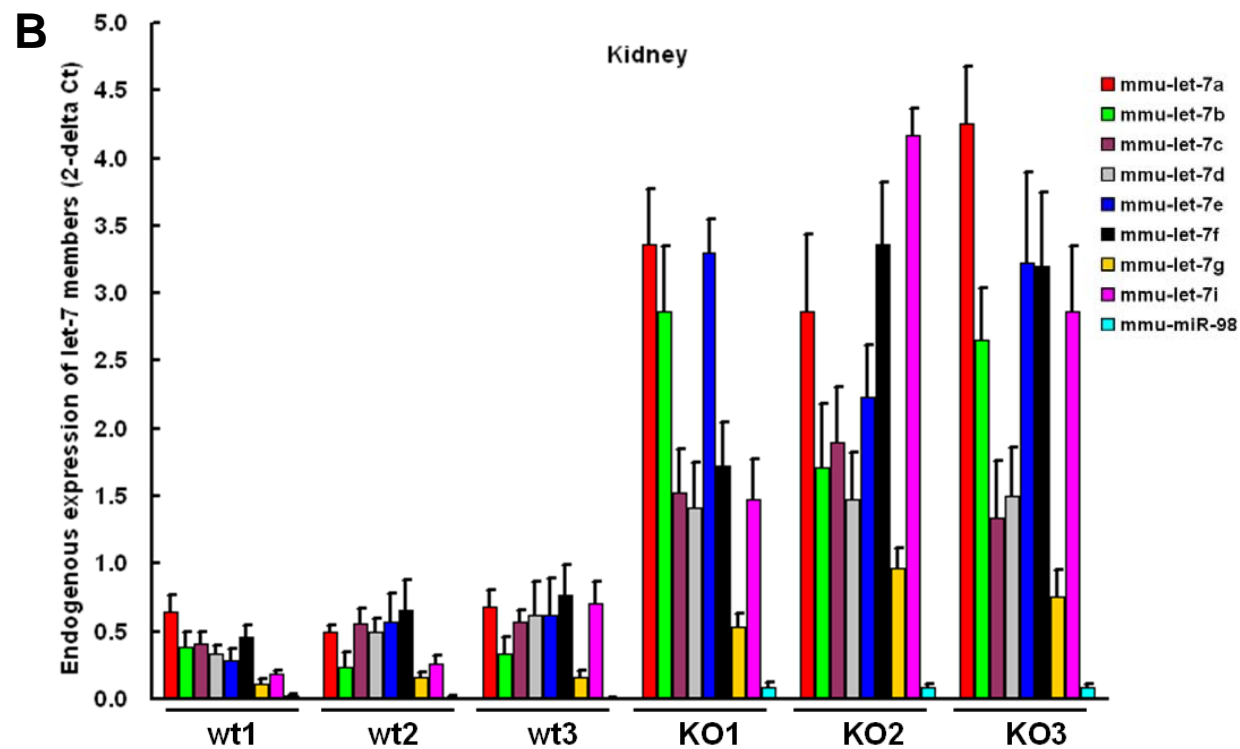

Supplement: JCI45390sd.pdf [file JCI45390sd.pdf]
